# Supplementary material
Source: publisher site journal article supplement (https://zse.pensoft.net/article/73630/download/suppl/31/)
Supplement: Supplementary file 1

Species	Voucher	12S	16S5'	16S3'	co1	cob	bdnf	rag1	rag2	tyr
G. decaryi	ZCMV 5223	JN664380	JN664345	FJ559186	JN680756	JN680747	JN664303	JN664478	JN664569	JN664527
G. granulatus	FAZC 8011	AY341594	AY341649	AY848341	JN133144	JN132938	JN664300	JN664475	JN664567	JN664524
G. horridus	MSZC 0163			MF768453
G. horridus	UADBA 10002			AY341708	JN133145	JN132939
G. klemmeri	FGZC 2727		JN664342	FJ559168	JN133147	JN132941	JN664298	JN664473	JN132829	JN664522
G. klemmeri	UMMZ 213033	AY454363	AY454386	AY454386
G. klemmeri	ZCMV 2063	AB325878	AB325878	AB325878		AB325878
G. lomorina	FGZC 3714			MG926822
G. lomorina	FGZC 3716			MG926821
G. lomorina	FGZC 3734			MG926823
G. lomorina	ZCMV 15273			MG926820
G. luteus	ZCMV 3245	JN664375	JN664339	FJ559173	JN133151	JN132945	JN664295	JN664470	JN664563	JN664519
G. malagasius	ZMA 19421		EF100471	AY848353	JN133152	JN132946	JN664294	JN664469	EF100496	JN664518
G. malagasius	ZCMV 91			AY848354
G. malagasius	ZCMV 7300
G. malagasius	FAZC 13977			HM364637
G. malagasius	PSG 49			HM631904
G. malagasius	PSG 1015			HM631905
G. marokoroko	KU 343225			OK574314*
G. marokoroko	KU 343230	OK574318*	OK574317*	OK574315*	OK574319*	OK574320*	OK574321*	OK574322*	OK574323*	OK574324*
G. marokoroko	KU 340737			OK574313*
G. marokoroko	KU 343218			OK574316*
G. plicifer	FGZC 174	JN664373	JN664337	AY848419	JN133155	JN132949	JN664292	JN664467	JN664561	JN664516
G. ranjomavo	FGZC 2843	JN664365	JN664328	FJ559188	JN133146	JN132940	JN664279	JN664454	JN664553	JN664503
G. rivicola	ZSM 180/2002	DQ901388	DQ235449	DQ901390	JN133158	DQ901386	JN664289	JN664464	EF100500	JN664513
G. runewsweeki	ZCMV 261	JN664372	JN664336	AY848308			JN664288	JN664463	JN664560	JN664512
G. sculpturatus	ZSM 92/2002	AY341597	AY341652	AY341709		EF100462	JN664285	JN664460	EF100499	JN664509
G. silvanus	ZSM 178/2002		EF100472	EF100468	JN133163	EF100463	JN664284	JN664459	EF100501	JN664508
G. sp Ca12	UMMZ 201404	AY454362	AY454385	AF261253
G. sp Ca13	UADBACRH486			OK574308*
G. sp Ca13	KU 340759			OK574309*
G. sp Ca13	FGMV 2002.415	JN664363	JN664326	AJ314807	JN133153	EF100461	JN664277	JN664452	JN664552	JN664501
G. sp Ca13	KU 340863			OK574310*
G. sp Ca13	KU 340736			OK574311*
G. sp Ca14	FAZCAndranobe			FJ559189
G. sp Ca14	MRSN A1991			AJ314797
G. spinifer	UADBA 25495	JN664360	JN664322	FJ559198	JN133164	JN132957	JN664273	JN664448	JN664548	JN664497
G. striatus	FGZC 2774	AY341595	AY341650	AY341650	JN133165	JN132958	JN664272	JN664447	JN664547	JN664496
G. striatus	MRSN A1938			AJ314796
G. striatus	THT225			MZ019379
G. striatus	UMMZ211685	AY454365		AY454390
G. tschenki	MVD 12	JN664357	JN664319		AY883985	JN132961
G. ventrimaculatus	UADBACRH119			OK574312*
G. ventrimaculatus	ZCMV 10655			KF610511
G. ventrimaculatus	ZCMV 4591			GU975157
G. ventrimaculatus	ZCMV 4927			GU975158
G. ventrimaculatus	ZCMV 3362	JN664356	JN664318	FJ559200	JN133169	JN132962	JN664268	JN664443	JN664543	JN664492
G. ventrimaculatus	ZCMV 4096			GU975159
G. webbi	MV 2001377		DQ235448	DQ250677	JN133170	DQ235441	JN664267	JN664442	JN664542	JN664491
Mantella madagascariensis	various	AB212225	AB212225	AB212225	JN133200	EF100464	AB612046	AB612043	AB612044	AB612045
